# Supplementary material for: Long-Term Clinical Outcome in Systemic Lupus Erythematosus Patients Followed for More Than 20 Years: The Milan Systemic Lupus Erythematosus Consortium (SMiLE) Cohort
Source: MDPI journal article supplement (doi:10.3390/jcm11133587), 2022-06-22

**Supplemental Table S1 – SLICC/ACR-DI items at the last time observation**

| <b>Item</b> | <b>Description</b>                                    | <b>Value (n=221)</b> |
|-------------|-------------------------------------------------------|----------------------|
| 1           | Cataract                                              | 33 (14.9%)           |
| 2           | Retinal involvement                                   | 15 (6.8%)            |
| 3           | Cognitive impairment/psychosis                        | 12 (5.4%)            |
| 4           | Seizures                                              | 13 (5.9%)            |
| 5           | Ictus                                                 | 11 (5%)              |
| 6           | Ictus+1                                               | 3 (1.4%)             |
| 7           | Cranial /periph neuropathy                            | 11 (5%)              |
| 8           | Transverse Myelitis                                   | 1 (0.5%)             |
| 9           | GFR<50                                                | 20 (9%)              |
| 10          | ProUr>3.5g/24h                                        | 7 (3.2%)             |
| 11          | ESRD                                                  | 2 (0.9%)             |
| 12          | PAH                                                   | 4 (1.8%)             |
| 13          | Pulmonary fibrosis                                    | 8 (3.6%)             |
| 14          | Shrinking lung                                        | 1 (0.5%)             |
| 15          | Pleural fibrosis                                      | 0 (0%)               |
| 16          | Pulmonary infarction                                  | 0 (0%)               |
| 17          | Angina-bypass                                         | 7 (3.2%)             |
| 18          | Myocardial infarction + 1                             | 5 (2.3%)             |
| 19          | Myocardial infarction                                 | 11 (5%)              |
| 20          | Cardiomyopathy                                        | 8 (3.6%)             |
| 21          | Valvular disease                                      | 12 (5.4%)            |
| 22          | Chronic pericarditis                                  | 2 (0.9%)             |
| 23          | Claudicatio                                           | 1 (0.5%)             |
| 24          | Minor tissue loss                                     | 6 (2.7%)             |
| 25          | Tissue loss                                           | 1 (0.5%)             |
| 26          | Tissue lost+1                                         | 1 (0.5%)             |
| 27          | DVT                                                   | 12 (5.4%)            |
| 28          | lower GI tract, liver, spleen surgery / infarction    | 3 (1.4%)             |
| 29          | lower GI tract, liver, spleen surgery / infarction +1 | 0 (0%)               |
| 30          | Mesenteric insufficiency                              | 0 (0%)               |
| 31          | Chronic peritonitis                                   | 2 (0.9%)             |
| 32          | Stricture / upper GI tract surgery                    | 1 (0.5%)             |

|    |                             |            |
|----|-----------------------------|------------|
| 33 | Myopathy/atrophy            | 5 (2.3%)   |
| 34 | Erosive/deforming arthritis | 26 (11.8%) |
| 35 | osteoporosis fracture       | 25 (11.3%) |
| 36 | Avascular necrosis          | 6 (2.7%)   |
| 37 | Avascular necrosis+1        | 3 (1.4%)   |
| 38 | Osteomyelitis               | 1 (0.5%)   |
| 39 | Alopecia                    | 5 (2.3%)   |
| 40 | Scarring/panniculum         | 10 (4.5%)  |
| 41 | Skin ulcers                 | 4 (1.8%)   |
| 42 | Gonadal failure             | 15 (6.8%)  |
| 43 | Diabetes                    | 8 (3.6%)   |
| 44 | Malignancy                  | 20 (9%)    |
| 45 | Malignancy+1                | 4 (1.8%)   |

Supplemental Figure S1 – BILAG scores at relevant time-points

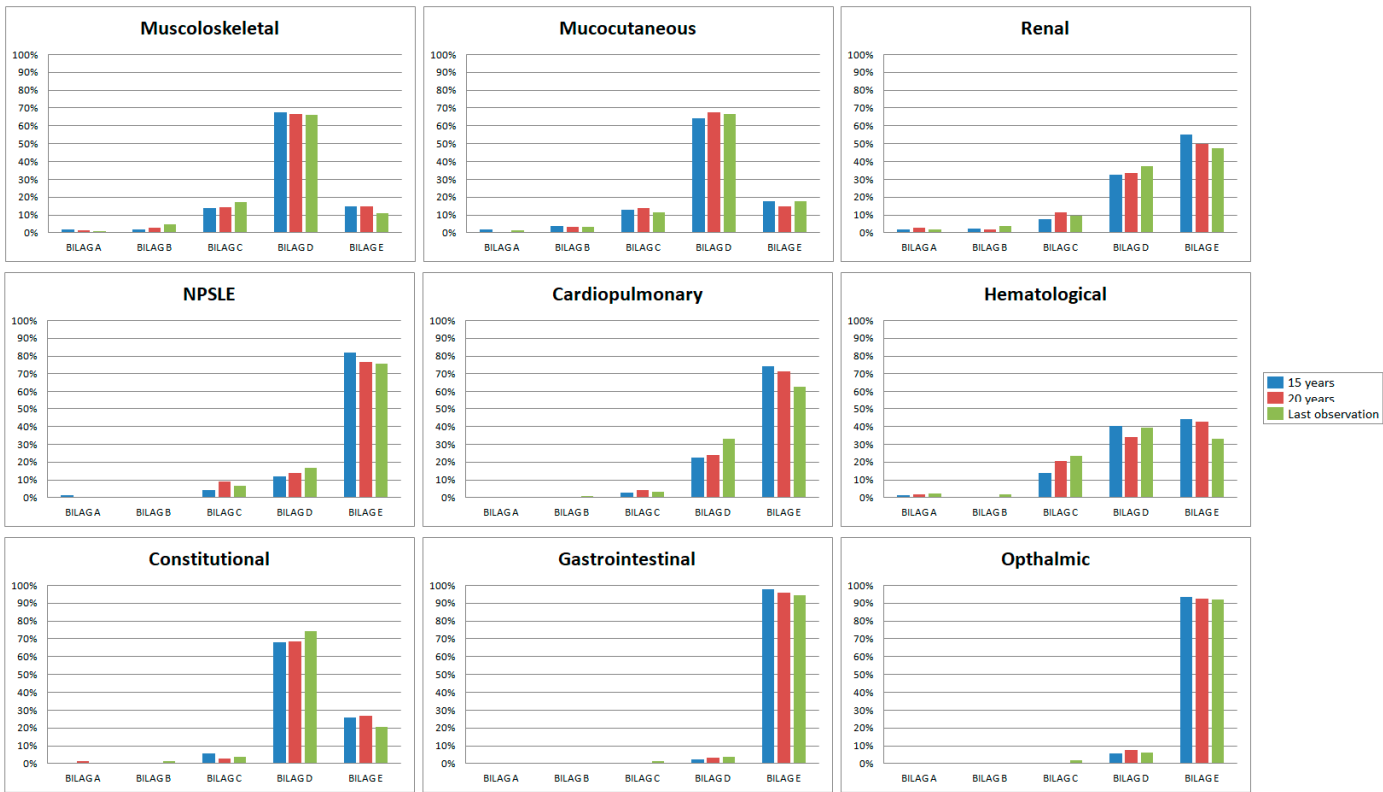

Percentage of patients with BILAG A-to-E scores in each domain at the 15<sup>th</sup>, 20<sup>th</sup> year of disease or at the last observation. Data from 168 patients at 15 years, 146 patients at 20 years; full dataset was available at the last observation.

**Supplemental Figure S2** – Risk of flares according to use of steroids at the 20<sup>th</sup> year or thereafter

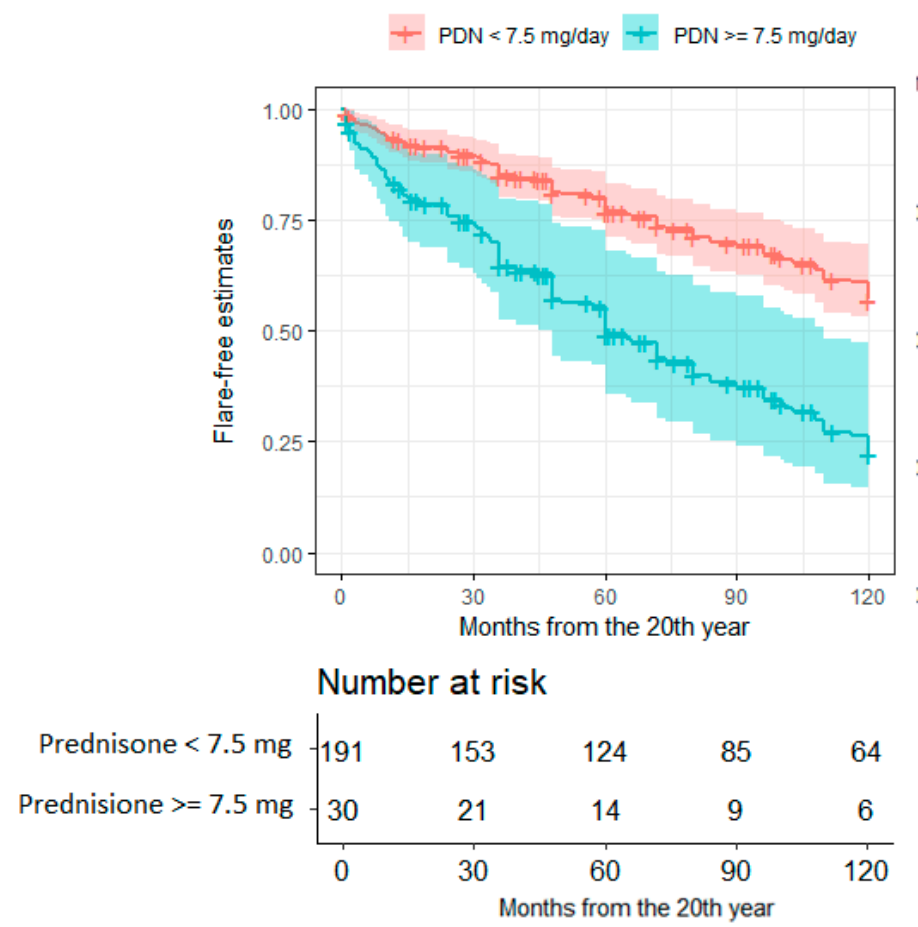

Supplement: s1 [file s1]
